# Supplementary material for: Financial Hardship and Quality of Life among African American and White Cancer Survivors: The Role of Limiting Care Due to Cost
Source: Oxford University Press journal article supplement (doi:10.1158/1055-9965.epi-18-1336), 2019-05-07
Supplement: 10559965epi181336-sup-213709_2_supp_5457562_ppv0m2.docx [file 10559965epi181336-sup-213709_2_supp_5457562_ppv0m2.docx]

**Supplemental Table 1.** FACT-G scores by number and type of financial hardships and care limitations

|  | **N** | **%** | **FACT-G** | **95% CI** | **Difference in FACT-G** | **95% CI** |
| --- | --- | --- | --- | --- | --- | --- |
| **Financial Hardship** | | | |  |  |  |
| **Number of financial hardships** | | | |  |  |  |
| None | 505 | 53.9 | 79.3 | (77.8, 80.9) | Ref | -- |
| 1 | 251 | 26.8 | 74.5 | (72.3, 76.6) | -4.8 | (-7.5, -2.2) |
| 2+ | 181 | 19.3 | 68.2 | (65.6, 70.7) | -11.2 | (-14.3, -8.0) |
| **Any financial hardship** | |  |  |  |  |  |
| No | 505 | 53.9 | 79.3 | (77.9, 80.8) | Ref | -- |
| Yes | 432 | 46.1 | 71.8 | (70.0, 73.6) | -7.5 | (-9.8, -5.2) |
| **Debt** |  |  |  |  |  |  |
| No | 727 | 74.5 | 78.5 | (77.3, 79.7) | Ref | -- |
| Yes | 249 | 25.5 | 68.6 | (66.1, 71.0) | -9.9 | (-12.7, -7.2) |
| **Borrow** |  |  |  |  |  |  |
| No | 881 | 90.3 | 76.9 | (75.7, 78.0) | Ref | -- |
| Yes | 95 | 9.7 | 66.9 | (62.9, 70.8) | -10.0 | (-14.1, -5.9) |
| **Used assets** |  |  |  |  |  |  |
| No | 922 | 93.3 | 76.4 | (75.2, 77.5) | Ref | -- |
| Yes | 66 | 6.7 | 71.2 | (66.8, 75.6) | -5.2 | (-9.7, -0.6) |
| **Refinanced or sold home** | |  |  |  |  |  |
| No | 979 | 99.1 | 76.2 | (75.0, 77.3) | Ref | -- |
| Yes | 9 | 0.9 | 61.4 | (51.7, 71.1) | -14.7 | (-24.5, -5.0) |
| **Sold stock** |  |  |  |  |  |  |
| No | 973 | 98.5 | 76.2 | (75.1, 77.4) | Ref | -- |
| Yes | 15 | 1.5 | 63.1 | (52.5, 73.7) | -13.2 | (-23.8, -2.5) |
| **Decrease in income** | |  |  |  |  |  |
| No | 659 | 70.6 | 77.7 | (76.4, 79.1) | Ref | -- |
| Yes | 275 | 29.4 | 72.3 | (70.2, 74.5) | -5.4 | (-7.9, -2.8) |
| **Care Limitations** | | |  |  |  |  |
| **Number of care limitations** | | |  |  |  |  |
| 0 | 799 | 82.5 | 78.2 | (77.0, 79.4) | Ref | -- |
| 1 | 123 | 12.7 | 67.8 | (64.8, 70.8) | -10.4 | (-13.6, -7.2) |
| 2+ | 47 | 4.9 | 61.0 | (55.5, 66.6) | -17.1 | (-22.8, -11.5) |
| **Any care limitations** | |  |  |  |  |  |
| No | 799 | 82.4 | 78.2 | (77.0, 79.4) | Ref | -- |
| Yes | 171 | 17.6 | 65.9 | (63.2, 68.6) | -12.3 | (-15.2, -9.4) |
| **Skipped doses of prescribed medication** | | | |  |  |  |
| No | 916 | 92.8 | 77.0 | (75.8, 78.1) | Ref | -- |
| Yes | 71 | 7.2 | 64.0 | (60.1, 67.9) | -13.0 | (-17.0, -8.9) |
| **Refused treatment** | |  |  |  |  |  |
| No | 936 | 95.0 | 76.5 | (75.4, 77.6) | Ref | -- |
| Yes | 49 | 5.0 | 67.0 | (61.3, 72.7) | -9.5 | (-15.3, -3.7) |
| **Did not go to doctor due to cost** | | |  |  |  |  |
| No | 862 | 88.6 | 77.7 | (76.5, 78.8) | Ref | -- |
| Yes | 111 | 11.4 | 63.3 | (59.9, 66.6) | -14.4 | (-18.0, -10.8) |

Abbreviations: CI – confidence interval; FACT-G – Functional Assessment of Cancer Therapy – General
