# Supplementary material for: Financial Hardship and Quality of Life among African American and White Cancer Survivors: The Role of Limiting Care Due to Cost
Source: Oxford University Press journal article supplement (doi:10.1158/1055-9965.epi-18-1336), 2019-05-07
Supplement: 10559965epi181336-sup-213709_2_supp_5457564_ppv0m2.docx [file 10559965epi181336-sup-213709_2_supp_5457564_ppv0m2.docx]

**Supplemental Table 2.** Associations between continuous measures of number of material financial hardships and care limitations due to cost and total and site-specific measures of health-related quality of life and physical, social, emotional, and functional wellbeing subscales

|  | **Observed Range** |  |  | **Financial Hardship** | | **Financial Hardship** | | **Limiting Care**  **Due to Cost** | | **Limiting Care**  **Due to Cost** | |
| --- | --- | --- | --- | --- | --- | --- | --- | --- | --- | --- | --- |
|  |  |  |  | **Unadjusted** | | **Adjusted** | | **Unadjusted** | | **Adjusted** | |
|  |  | **Mean** | **SD** | **Diff. in FACT-G score** | **95% CI** | **Diff. in FACT-G score** | **95% CI** | **Diff. in FACT-G score** | **95% CI** | **Diff. in FACT-G score** | **95% CI** |
| FACT-G | 14-108 | 76.0 | 18.0 | -4.5 | (-5.6, -3.3) | -2.4 | (-3.6, -1.3) | -8.4 | (-10.3, -6.4) | -5.1 | (-6.9, -3.3) |
| White | 14-108 | 79.5 | 17.9 | -5.7 | (-7.4, -4.0) | -1.3 | (-3.1, 0.4) | -10.9 | (-14.4, -7.4) | -3.6 | (-6.7, -0.5) |
| African American | 16-108 | 73.3 | 17.6 | -3.2 | (-4.7, -1.7) | -3.0 | (-4.5, -1.5) | -6.5 | (-8.8, -4.2) | -5.9 | (-8.2, -3.5) |
| Pinteraction |  |  |  |  | 0.054 |  | 0.45 |  | 0.038 |  | 0.24 |
|  |  |  |  |  |  |  |  |  |  |  |  |
| PWB | 0-28 | 20.9 | 5.9 | -1.7 | (-2.1, -1.3) | -1.1 | (-1.5, -0.7) | -2.5 | (-3.2, -1.9) | -1.7 | (-2.3, -1.1) |
| SWB | 0-28 | 19.4 | 5.9 | -0.3 | (-0.7, 0.1) | -0.1 | (-0.4, 0.3) | -1.6 | (-2.3, -0.9) | -0.8 | (-1.5, -0.2) |
| EWB | 0-24 | 18.6 | 4.5 | -0.9 | (-1.2, -0.6) | -0.5 | (-0.8, -0.2) | -1.5 | (-2.1, -1.0) | -1.0 | (-1.5, -0.5) |
| FWB | 0-28 | 17.2 | 6.8 | -1.5 | (-1.9, -1.1) | -0.7 | (-1.1, -0.4) | -2.7 | (-3.4, -2.0) | -1.5 | (-2.1, -0.8) |
|  |  |  |  |  |  |  |  |  |  |  |  |
| FACT-B | 34-147 | 100.6 | 24.3 | -6.4 | (-8.5, -4.2) | -3.2 | (-5.5, -0.9) | -12.2 | (-15.4, -9.1) | -7.9 | (-11.1, -4.7) |
| FACT-C | 37-133 | 94.6 | 21.3 | -4.2 | (-8.2, -0.2) | -1.3 | (-6.0, 3.5) | -9.1 | (-17.2, -1.0) | -8.0 | (-17.5, 1.6) |
| FACT-L | 22-120 | 85.9 | 16.9 | -2.7 | (-5.3, -0.1) | -2.0 | (-4.2, 0.3) | -5.6 | (-11.5, 0.3) | -1.3 | (-5.3, 2.6) |
| FACT-P | 28-155 | 111.5 | 23.7 | -9.1 | (-13.0, -5.2) | -5.5 | (-9.3, -1.6) | -13.9 | (-20.0, -7.8) | -9.7 | (-14.8, -4.5) |
|  |  |  |  |  |  |  |  |  |  |  |  |

Abbreviations: CI – confidence interval; EWB – emotional wellbeing, FACT-B – Functional Assessment of Cancer Therapy – Breast; FACT-C – Functional Assessment of Cancer Therapy – Colorectal; FACT-G – Functional Assessment of Cancer Therapy – General; FACT-L – Functional Assessment of Cancer Therapy – Lung; FACT-P – Functional Assessment of Cancer Therapy – Prostate; FWB – functional wellbeing; PWB – physical wellbeing; SD – standard deviation; SWB – social wellbeing

Adjusted models control for age, sex, race, marital status, income, education, employment status, health insurance, comorbid conditions, cancer site, stage at diagnosis, and treatments received.
