# Supplementary material for: Financial Hardship and Quality of Life among African American and White Cancer Survivors: The Role of Limiting Care Due to Cost
Source: Oxford University Press journal article supplement (doi:10.1158/1055-9965.epi-18-1336), 2019-05-07
Supplement: 10559965epi181336-sup-213709_2_supp_5457566_ppv0m3.docx [file 10559965epi181336-sup-213709_2_supp_5457566_ppv0m3.docx]

**Supplementary Table 4.** Associations between material financial hardship excluding assets and health-related quality of life

|  | **Observed Range** |  |  | **Financial Hardship** | | **Financial Hardship** | |
| --- | --- | --- | --- | --- | --- | --- | --- |
|  |  |  |  | **Unadjusted** | | **Adjusted** | |
|  |  | **Mean** | **SD** | **Diff. in FACT-G score** | **95% CI** | **Diff. in FACT-G score** | **95% CI** |
| FACT-G | 14-108 | 76.0 | 18.0 | -7.9 | (-10.2, -5.6) | -4.0 | (-6.2, -1.9) |
| White | 14-108 | 79.5 | 17.9 | -11.0 | (-14.7, -7.2) | -3.3 | (-7.1, 0.4) |
| African American | 16-108 | 73.6 | 17.6 | -4.9 | (-7.9, -1.9) | -4.2 | (-7.0, -1.4) |
| Pinteraction |  |  |  |  | 0.013 |  | 0.78 |
|  |  |  |  |  |  |  |  |

Abbreviations: CI – confidence interval; FACT-G – Functional Assessment of Cancer Therapy – General; SD – standard deviation

Adjusted models control for age, sex, race, marital status, income, education, employment status, health insurance, comorbid conditions, cancer site, stage at diagnosis, and treatments received.
